# Supplementary material
Source: HighWire-hosted journal article supplement (https://www.cmaj.ca/highwire/filestream/59165/field_highwire_adjunct_files/1/lung-liu-2-at.pdf)
Supplement: lung-liu-2-at.pdf [file lung-liu-2-at.pdf]

**Appendix 2 (as supplied by the authors): Demographic characteristics and ventilatory settings for patients in each study**

| Study*                       | Age, years              |             | Weight, kg  |             | Protocolized sedation | Protocolized weaning | Respiratory rate, per minute  |       | Mode of ventilation |      | Inspired fraction of oxygen, % |     | Inspiratory/ expiratory ratio |       | Plateau airway pressure, cmH <sub>2</sub> O |            | Duration of mechanical ventilation, h |            |
|------------------------------|-------------------------|-------------|-------------|-------------|-----------------------|----------------------|-------------------------------|-------|---------------------|------|--------------------------------|-----|-------------------------------|-------|---------------------------------------------|------------|---------------------------------------|------------|
|                              | PV                      | CV          | PV          | CV          |                       |                      | PV                            | CV    | PV                  | CV   | PV                             | CV  | PV                            | CV    | PV                                          | CV         | PV                                    | CV         |
|                              | Chaney et al., 2000 [1] | 59 ± 12     | 68 ± 9      | 87 ± 13     |                       |                      | 81 ± 15                       | Yes   | Yes                 | 16   | 8                              | VCV | VCV                           | 100   | 100                                         | 1:3        | 1:3                                   | 17.6 ± 4.8 |
| Koner et al., 2004 [2]       | 59 ± 10                 | 57 ± 9.3    | 65 ± 4.4    | 70 ± 12     | NR                    | NR                   | 15                            | 9     | VCV                 | VCV  | 50                             | 50  | 1:2                           | 1:2   | 14.4 ± 2                                    | 17.5 ± 2   | NR                                    | NR         |
| Wrigge et al., 2004 [3]      | 57.5 ± 15.5             | 60 ± 11.5   | 69 ± 8.5    | 65 ± 9      | NR                    | NR                   | Adjusted by PaCO <sub>2</sub> |       | Free                | Free | 30                             | 30  | NR                            | NR    | NR                                          | NR         | NR                                    | NR         |
| Wrigge et al., 2005 [4]      | 67 ± 11                 | 61 ± 10     | 66 ± 12     | 64 ± 9      | Yes                   | NR                   | Adjusted by PaCO <sub>2</sub> |       | Free                | Free | Adjusted by ARDSnet            |     | NR                            | NR    | 18 ± 3                                      | 22 ± 3     | NR                                    | NR         |
| Zupancich et al., 2005 [5]   | 66.5 ± 9.8              | 68.7 ± 7.4  | NR          | NR          | NR                    | NR                   | 12-15                         | 12-15 | Free                | Free | 50                             | 50  | 1:2                           | 1:2   | NR                                          | NR         | NR                                    | NR         |
| Michelet et al., 2006 [6]    | 61 ± 10                 | 60 ± 8.5    | NR          | NR          | NR                    | Yes                  | Adjusted by PaCO <sub>2</sub> |       | Free                | Free | 50                             | 50  | NR                            | NR    | 20 ± 3.5                                    | 26 ± 3     | NR                                    | NR         |
| Cai et al., 2007 [7]         | 37 ± 11                 | 39 ± 11     | 58 ± 8      | 56 ± 5      | NR                    | NR                   | Adjusted by PaCO <sub>2</sub> |       | VCV                 | VCV  | 100                            | 100 | NR                            | NR    | NR                                          | NR         | 6.9 ± 2.2                             | 7.4 ± 3.1  |
| Determann et al., 2008 [8]   | 62 ± 9.8                | 61 ± 9.5    | 70 ± 9.5    | 69 ± 10.6   | NR                    | NR                   | Adjusted by PaCO <sub>2</sub> |       | VCV                 | VCV  | 40                             | 40  | 1:2                           | 1:2   | NR                                          | NR         | NR                                    | NR         |
| Lin et al., 2008 [9]         | 55                      | 54          | 55.3 ± 11.8 | 58.4 ± 15.7 | NR                    | NR                   | Adjusted by PaCO <sub>2</sub> |       | VCV                 | VCV  | Adjusted by PaO <sub>2</sub>   |     | 1:1                           | 1:1.5 | 12.4 ± 2.1                                  | 21.5 ± 3.1 | 4.3 ± 0.9                             | 4.2 ± 0.7  |
| Weingarten et al., 2010 [10] | 73.8                    | 72.1        | NR          | NR          | NR                    | NR                   | Adjusted by PaCO <sub>2</sub> |       | VCV                 | VCV  | 50                             | 50  | 1:2                           | 1:2   | NR                                          | NR         | 5.1 ± 1.9                             | 5.7 ± 1.7  |
| Sundar et al., 2011 [11]     | 66 ± 11.7               | 66.5 ± 11   | 87 ± 20     | 85.1 ± 19.1 | Yes                   | Yes                  | Adjusted by PaCO <sub>2</sub> |       | Free                | Free | Adjusted by ARDSnet            |     | NR                            | NR    | 19.7 ± 3.6                                  | 20.4 ± 4.5 | 7.5                                   | 10.7       |
| Yang et al., 2011 [12]       | 58 ± 12                 | 60 ± 10     | 61 ± 17     | 59 ± 15     | NR                    | NR                   | Adjusted by PaCO <sub>2</sub> |       | PCV                 | VCV  | 50                             | 100 | 1:2                           | 1:2   | 16 ± 4                                      | 16 ± 4     | 3.9 ± 1                               | 4.2 ± 1    |
| Memtsoudis et al., 2012 [13] | 60 ± 15                 | 50 ± 12     | NR          | NR          | NR                    | NR                   | Adjusted by PaCO <sub>2</sub> |       | VCV                 | VCV  | 50                             | 50  | 1:2                           | 1:2   | 19 ± 2.3                                    | 23 ± 6     | 5.1 ± 1.1                             | 4.6 ± 0.8  |
| Treschan et al., 2012 [14]   | 68 ± 8                  | 68 ± 9      | 79 ± 16     | 77 ± 12     | NR                    | NR                   | Adjusted by PaCO <sub>2</sub> |       | Free                | Free | 50                             | 50  | 1:2                           | 1:2   | 15 ± 3                                      | 17 ± 3     | 8.7 ± 5.2                             | 8.7 ± 5.9  |
| Futier et al., 2013 [15]     | 61.6 ± 11               | 63.4 ± 10   | 71.4 ± 14.2 | 71.3 ± 13.9 | NR                    | NR                   | Adjusted by PaCO <sub>2</sub> |       | VCV                 | VCV  | Adjusted by PaO <sub>2</sub>   |     | NR                            | NR    | 15.2 ± 2.6                                  | 16.6 ± 3.5 | 5.3 ± 2.3                             | 5.7 ± 2.1  |
| Maslow et al., 2013 [16]     | 61.2 ± 14.4             | 69.6 ± 12.9 | 71.4 ± 16.8 | 73.9 ± 13.6 | Yes                   | NR                   | 14                            | 7     | VCV                 | VCV  | Adjusted by PaO <sub>2</sub>   |     | 1:1.7                         | 1:1.7 | NR                                          | NR         | NR                                    | NR         |
| Severgnini et al., 2013 [17] | 65.5 ± 11.4             | 67 ± 9      | NR          | NR          | NR                    | NR                   | Adjusted by PaCO <sub>2</sub> |       | VCV                 | VCV  | 40                             | 40  | 1:2                           | 1:2   | 18                                          | 16         | 3.2 ± 1.1                             | 3.7 ± 1.3  |
| Shen et al., 2013 [18]       | 60.5 ± 7.3              | 57.2 ± 9.1  | NR          | NR          | NR                    | NR                   | Adjusted by PaCO <sub>2</sub> |       | Free                | Free | Adjusted by PaO <sub>2</sub>   |     | NR                            | NR    | NR                                          | NR         | 3.6 ± 1.2                             | 3.3 ± 1.5  |
| Qutub et al., 2014 [19]      | 41                      | 36          | 75.9 ± 9.4  | 77.8 ± 12.8 | NR                    | NR                   | Adjusted by PaCO <sub>2</sub> |       | Free                | Free | 50                             | 50  | 1:2.5                         | 1:2.5 | NR                                          | NR         | 2.3 ± 0.2                             | 2.1 ± 0.3  |

Note: CV = conventional ventilation, NR = not reported, PCV = pressure controlled ventilation, PV = protective ventilation, VCV = volume-controlled ventilation.

\*See next page for references.

## References

1. Chaney MA, Nikolov MP, Blakeman BP, et al. Protective ventilation attenuates postoperative pulmonary dysfunction in patients undergoing cardiopulmonary bypass. *J Cardiothorac Vasc Anesth* 2000;14:514-8.
2. Koner O, Celebi S, Balci H, et al. Effects of protective and conventional mechanical ventilation on pulmonary function and systemic cytokine release after cardiopulmonary bypass. *Intensive Care Med* 2004;30:620-6.
3. Wrigge H, Uhlig U, Zinserling J, et al. The effects of different ventilatory settings on pulmonary and systemic inflammatory responses during major surgery. *Anesth Analg* 2004;98:775-81.
4. Wrigge H, Uhlig U, Baumgarten G, et al. Mechanical ventilation strategies and inflammatory responses to cardiac surgery: a prospective randomized clinical trial. *Intensive Care Med* 2005;31:1379-87.
5. Zupancich E, Paparella D, Turani F, et al. Mechanical ventilation affects inflammatory mediators in patients undergoing cardiopulmonary bypass for cardiac surgery: a randomized clinical trial. *J Thorac Cardiovasc Surg* 2005;130:378-83.
6. Michelet P, D'Journo XB, Roch A, et al. Protective ventilation influences systemic inflammation after esophagectomy: a randomized controlled study. *Anesthesiology* 2006;105:911-9.
7. Cai H, Gong H, Zhang L, et al. Effect of low tidal volume ventilation on atelectasis in patients during general anesthesia: a computed tomographic scan. *J Clin Anesth* 2007;19:125-9.
8. Determann RM, Wolthuis EK, Choi G, et al. Lung epithelial injury markers are not influenced by use of lower tidal volumes during elective surgery in patients without preexisting lung injury. *Am J Physiol Lung Cell Mol Physiol* 2008;294:L344-50.
9. Lin WQ, Lu XY, Cao LH, et al. Effects of the lung protective ventilatory strategy on proinflammatory cytokine release during one-lung ventilation. *Ai Zheng* 2008;27:870-3.
10. Weingarten TN, Whalen FX, Warner DO, et al. Comparison of two ventilatory strategies in elderly patients undergoing major abdominal surgery. *Br J Anaesth* 2010;104:16-22.
11. Sundar S, Novack V, Jervis K, et al. Influence of low tidal volume ventilation on time to extubation in cardiac surgical patients. *Anesthesiology* 2011;114:1102-10.
12. Yang M, Ahn HJ, Kim K, et al. Does a protective ventilation strategy reduce the risk of pulmonary complications after lung cancer surgery? A randomized controlled trial. *Chest* 2011;139:530-7.
13. Memtsoudis SG, Bombardieri AM, Ma Y, et al. The effect of low versus high tidal volume ventilation on inflammatory markers in healthy individuals undergoing posterior spine fusion in the prone position: a randomized controlled trial. *J Clin Anesth* 2012;24:263-9.
14. Treschan TA, Kaisers W, Schaefer MS, et al. Ventilation with low tidal volumes during upper abdominal surgery does not improve postoperative lung function. *Br J Anaesth* 2012;109:263-71.
15. Futier E, Constantin JM, Paugam-Burtz C, et al.; IMPROVE Study Group. A trial of intraoperative low-tidal-volume ventilation in abdominal surgery. *N Engl J Med* 2013;369:428-37.
16. Maslow AD, Stafford TS, Davignon KR, et al. A randomized comparison of different ventilator strategies during thoracotomy for pulmonary resection. *J Thorac Cardiovasc Surg* 2013;146:38-44.
17. Severgnini P, Selmo G, Lanza C, et al. Protective mechanical ventilation during general anesthesia for open abdominal surgery improves postoperative pulmonary function. *Anesthesiology* 2013;118:1307-21.
18. Shen Y, Zhong M, Wu W, et al. The impact of tidal volume on pulmonary complications following minimally invasive esophagectomy: a randomized and controlled study. *J Thorac Cardiovasc Surg* 2013;146:1267-73.
19. Qutub H, El-Tahan MR, Mowafi HA, et al. Effect of tidal volume on extravascular lung water content during one-lung ventilation for video-assisted thoracoscopic surgery: a randomised, controlled trial. *Eur J Anaesthesiol* 2014;31:466-73.
